# Supplementary material for: YY1 Oligomerization Is Regulated by Its OPB Domain and Competes with Its Regulation of Oncoproteins
Source: MDPI journal article supplement (doi:10.3390/cancers14071611), 2022-03-22

Original Figure

Figure 2B:

IP; HA Ab

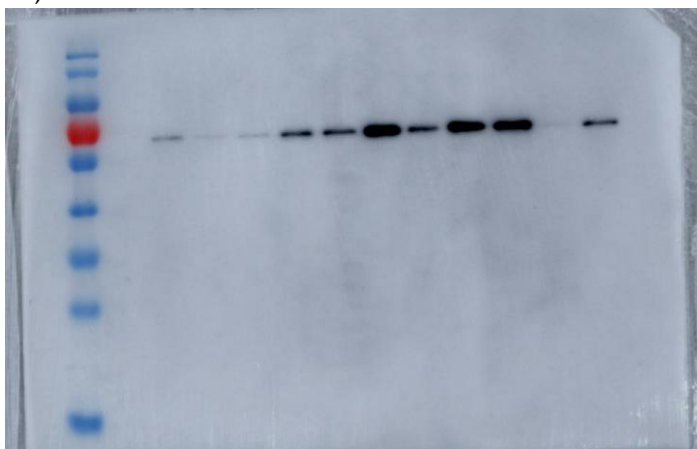

Direct WB; Flag Ab

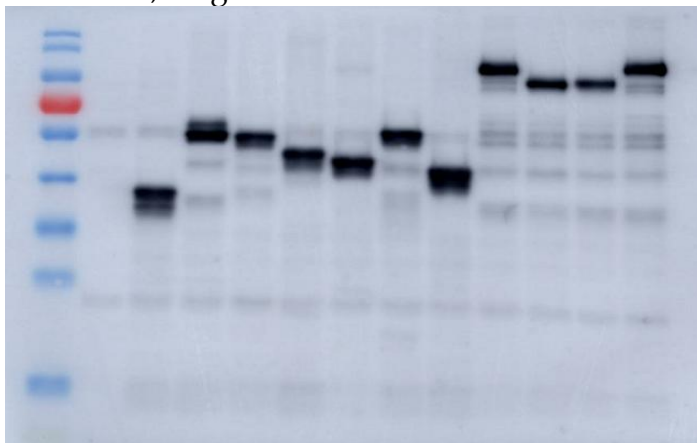

Direct WB; HA Ab

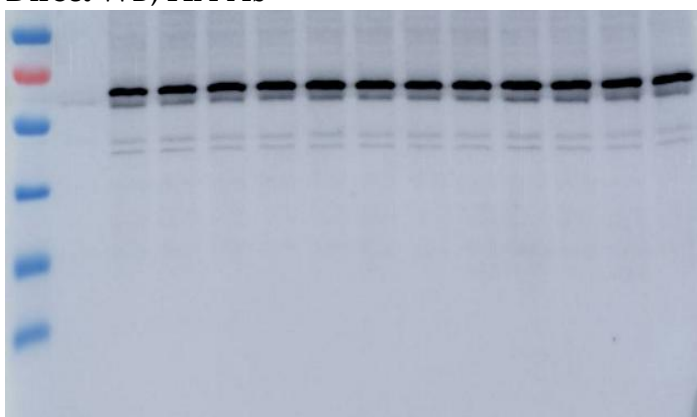

Figure 2C:  
IP; HA Ab

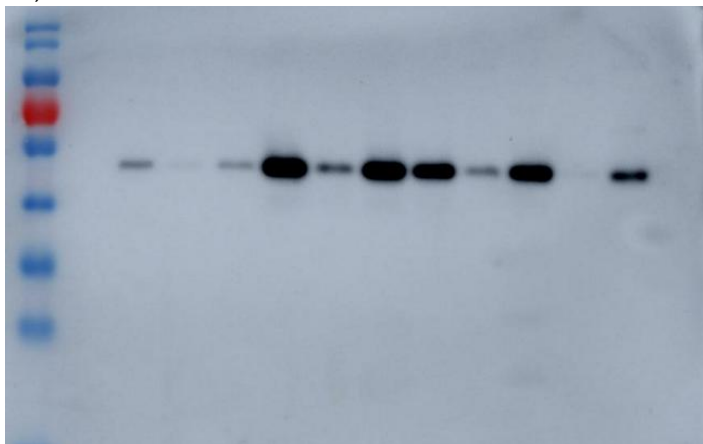

Direct WB; Flag Ab

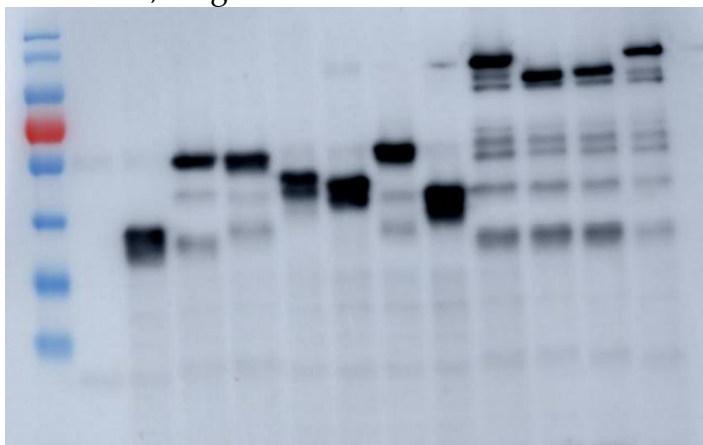

Direct WB; HA Ab

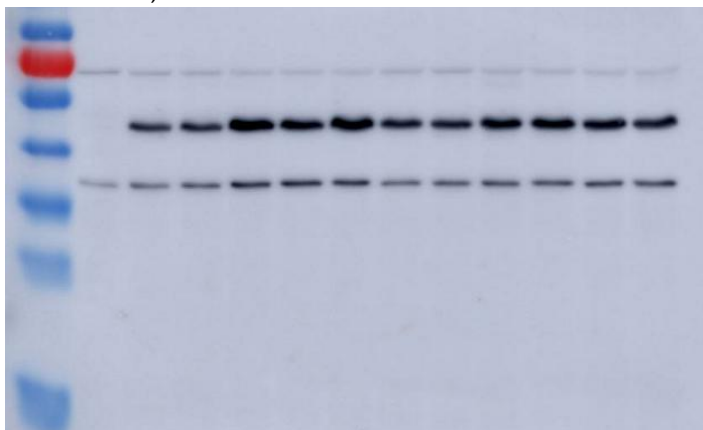

Figure 2E:  
IP; HA Ab

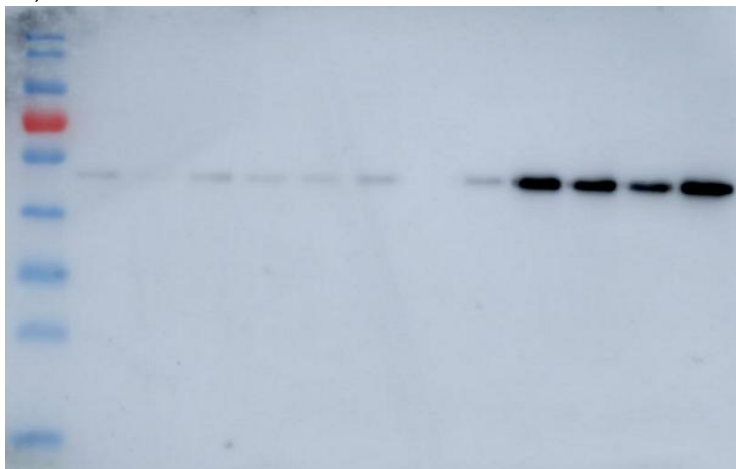

IP; mCherry Ab

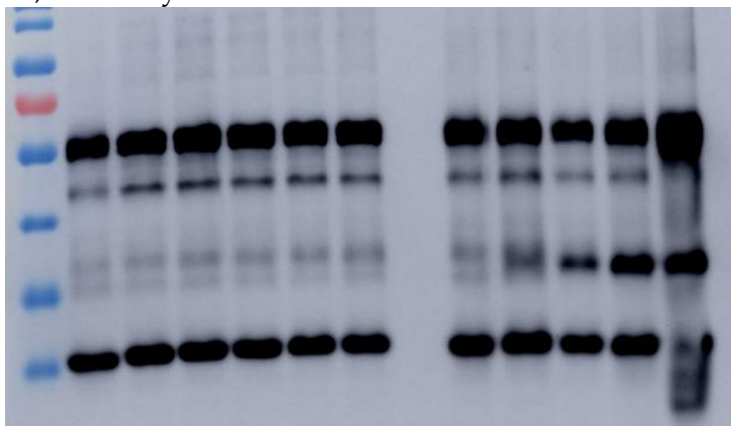

Direct WB; Flag Ab

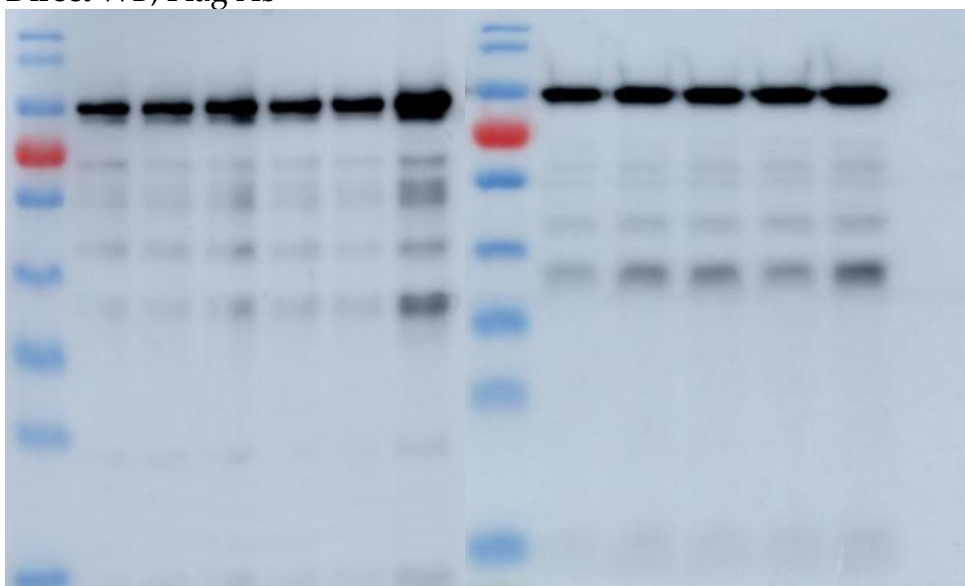

Direct WB; HA Ab

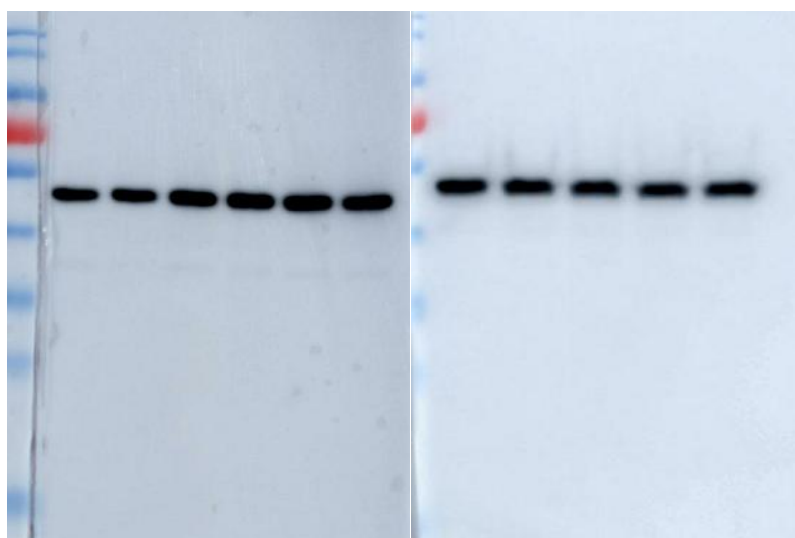

Direct WB; mCherry Ab

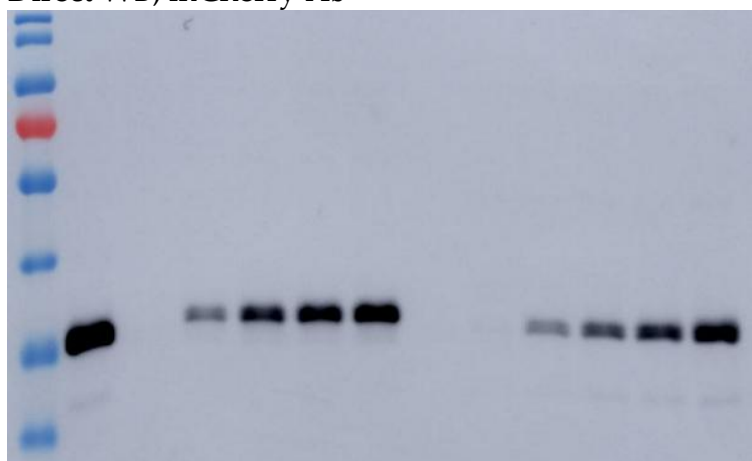

Figure 3B:  
IP; HA Ab

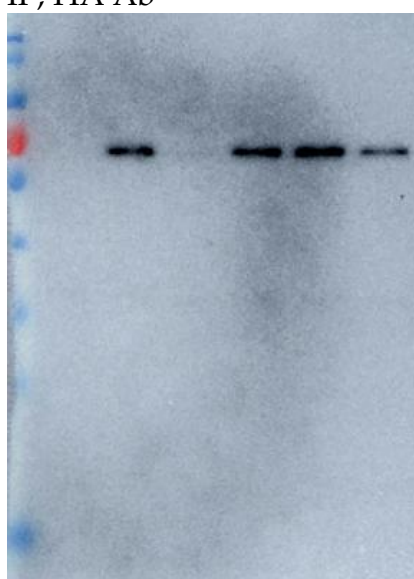

Direct WB; Flag Ab

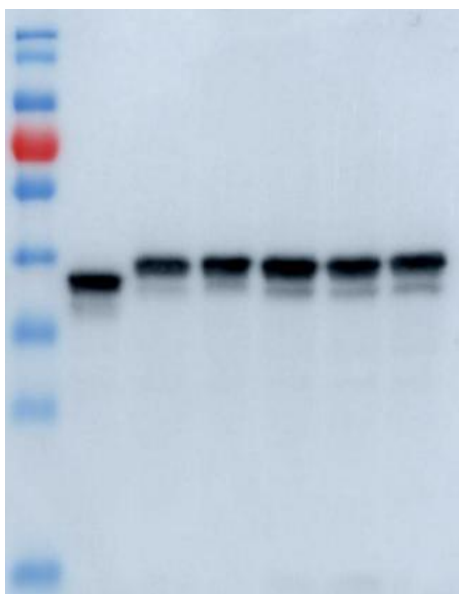

Direct WB; HA Ab

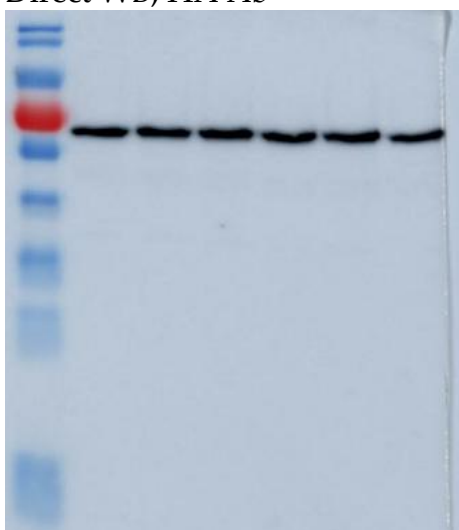

Figure 3C:  
IP; HA Ab

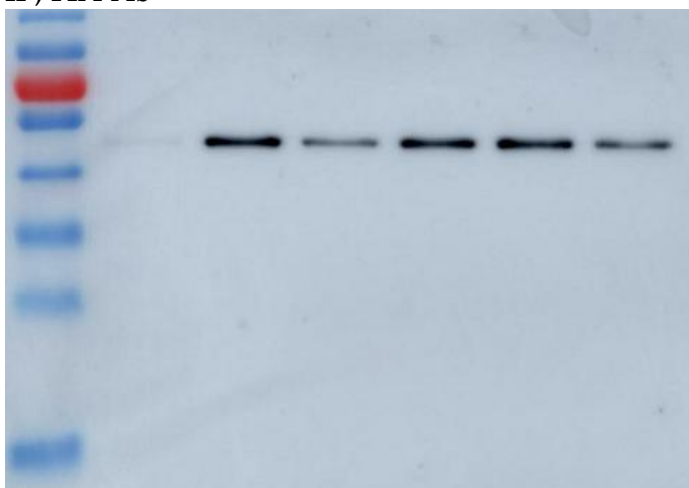

IP; mCherry Ab

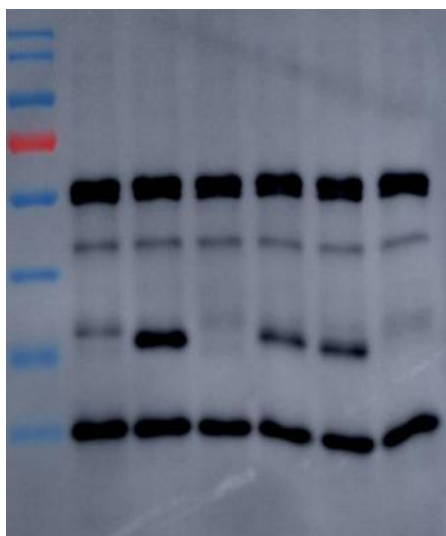

Direct WB; Flag Ab

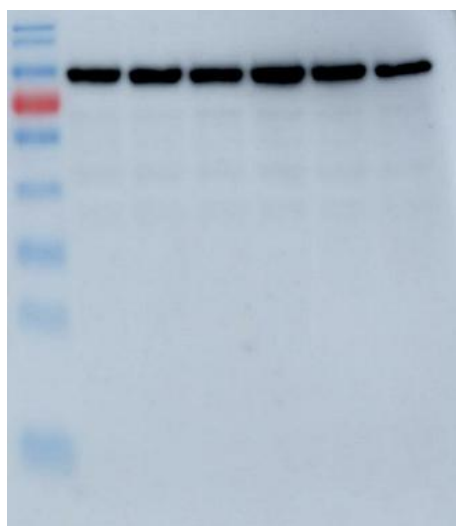

Direct WB; HA Ab

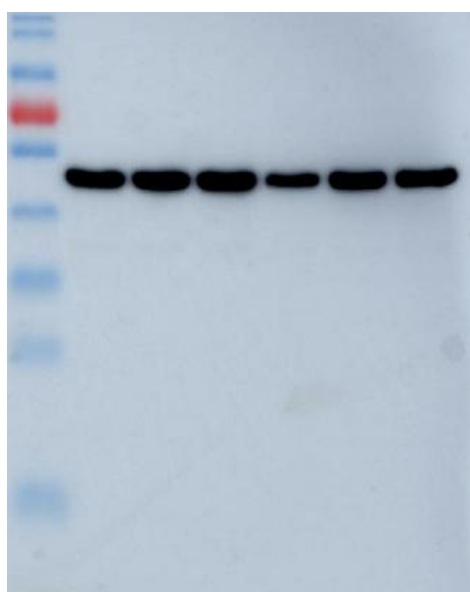

Direct WB; mCherry Ab

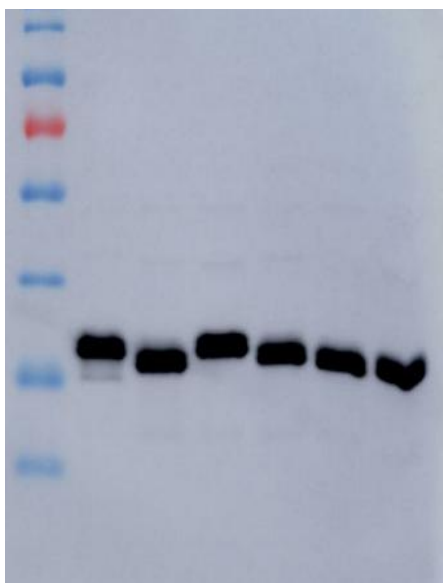

Figure 3D:  
IP; HA Ab

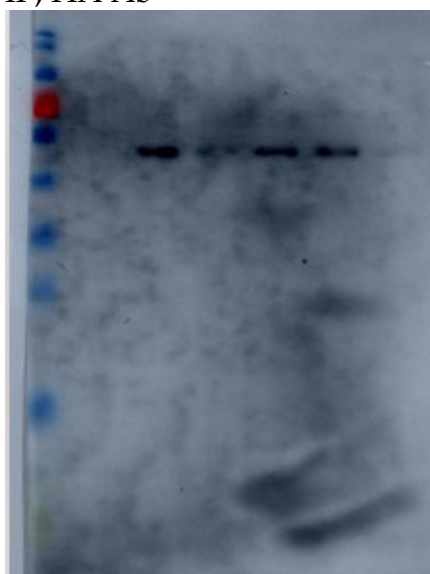

Direct WB; Flag Ab

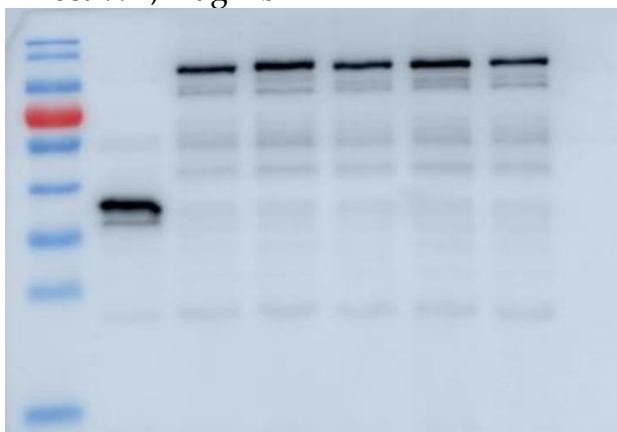

Direct WB; HA Ab

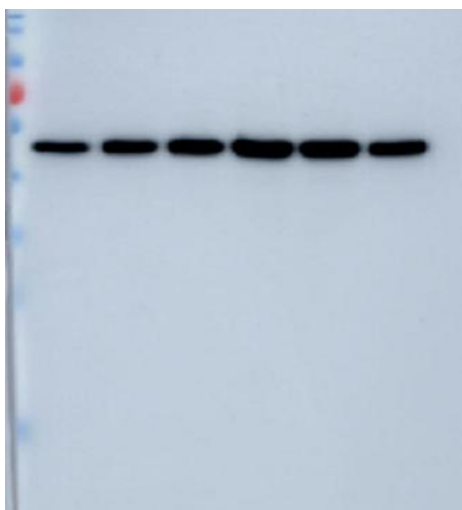

Figure 3F:  
Native gel; Flag Ab

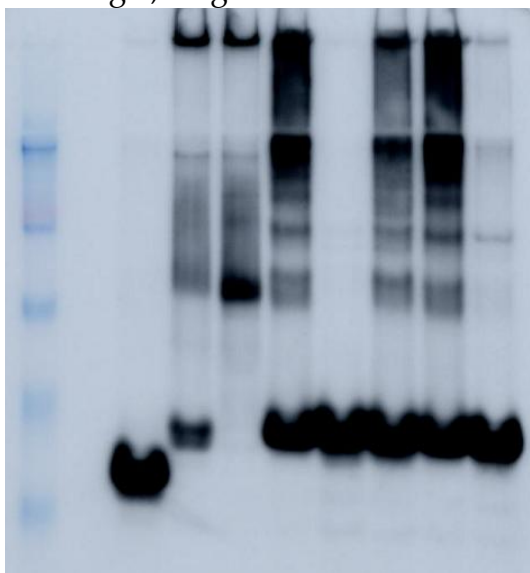

Denatured gel; HA Ab

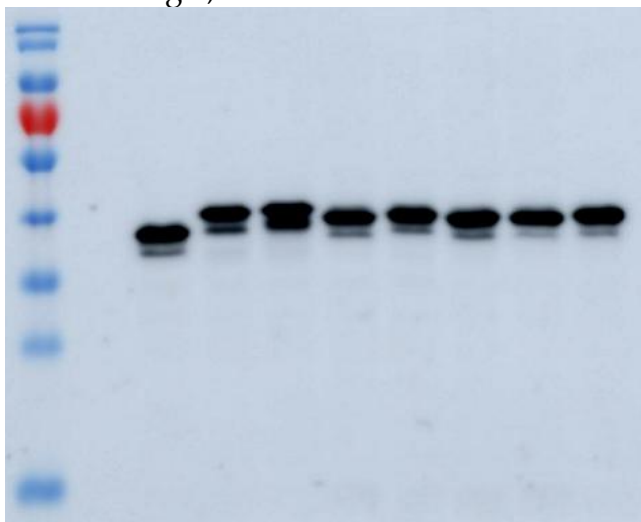

Figure 4B:



Doxycycline (Dox) induced knock-down

YY1 Ab

GAPDH Ab

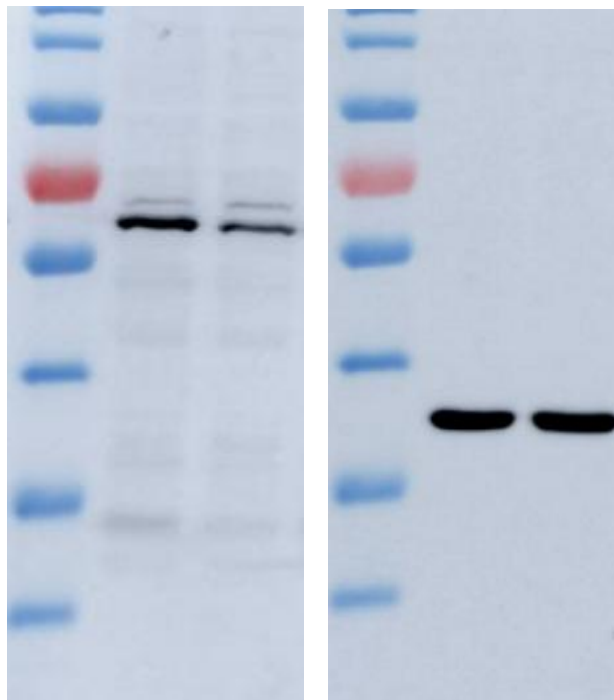

Flag Ab

GAPDH Ab

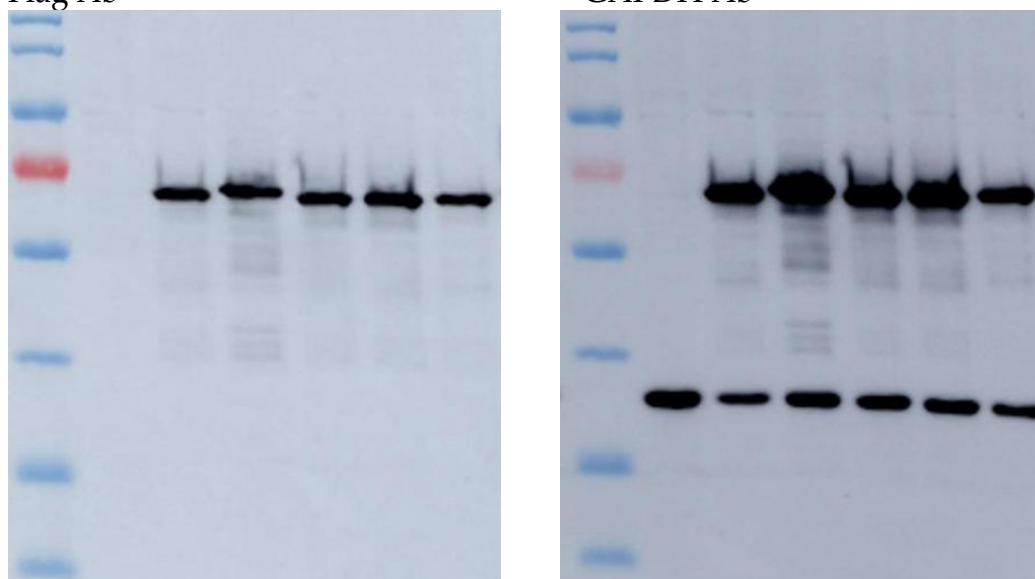

Figure 4D:

Doxycycline (Dox) induced knock-down

YY1 Ab

GAPDH Ab

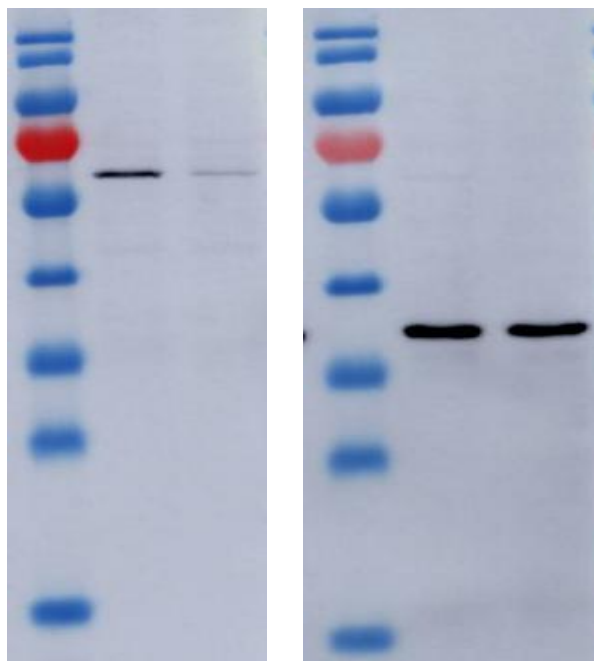

Flag Ab

GAPDH Ab

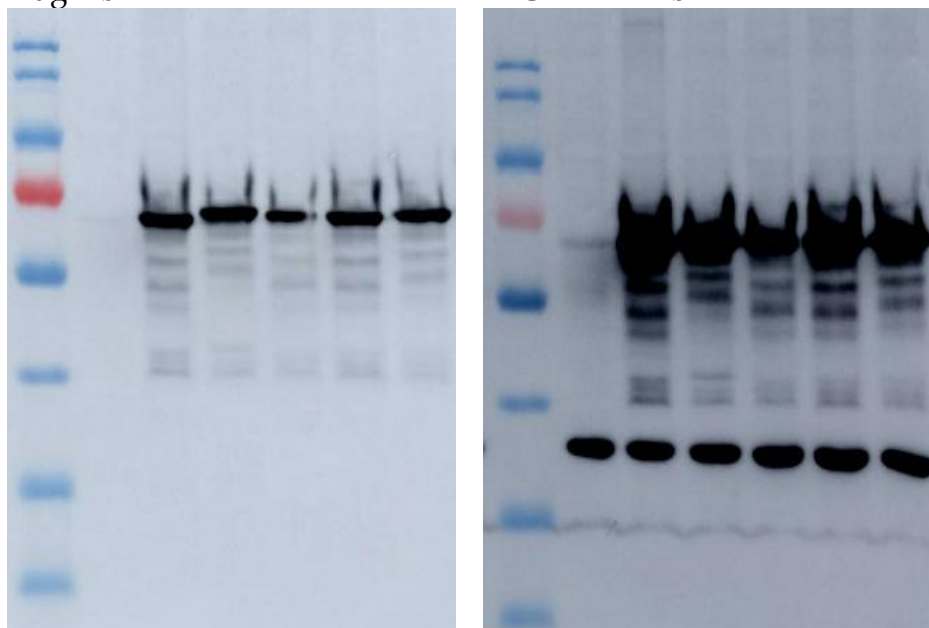

Figure 5A:

His Ab

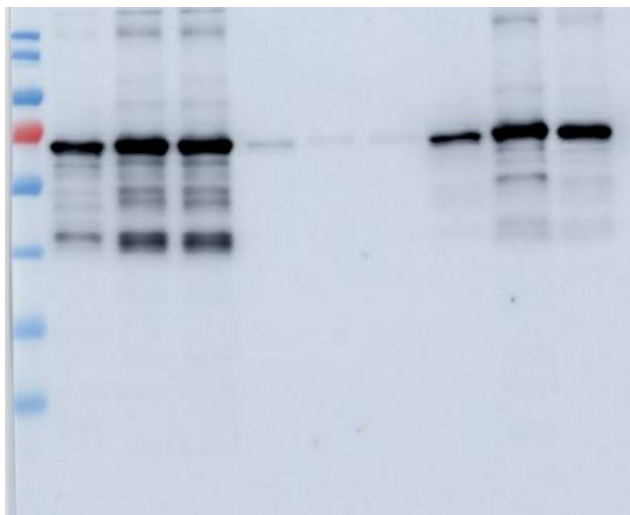

Figure 5B:  
IP; EZH2 Ab

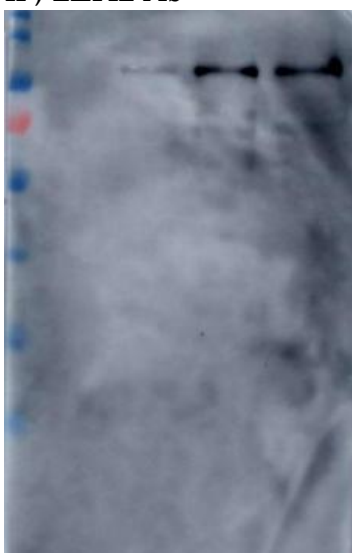

Direct WB; Flag Ab

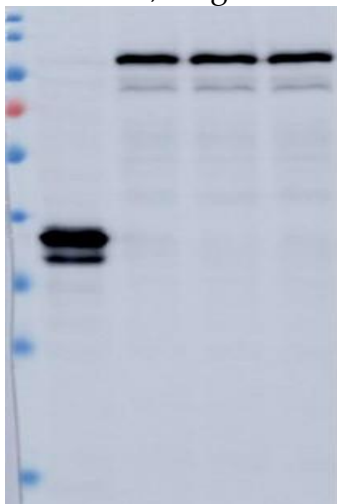

Direct WB; EZH2 Ab

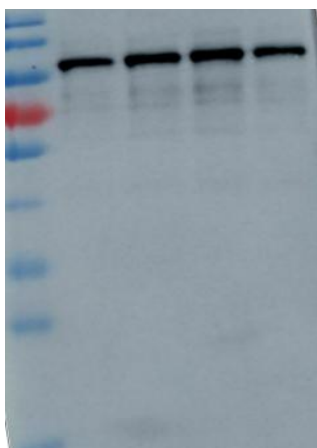

Figure 5C:  
IP; HA Ab

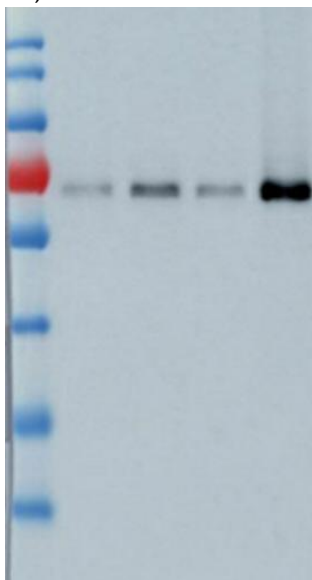

Direct WB; Flag Ab

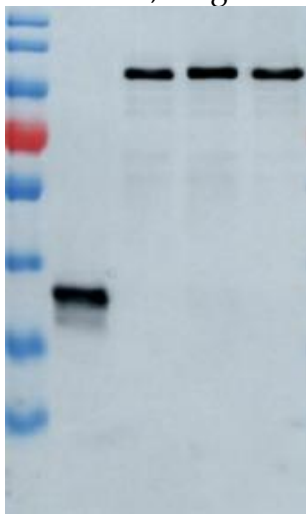

Direct WB; HA Ab

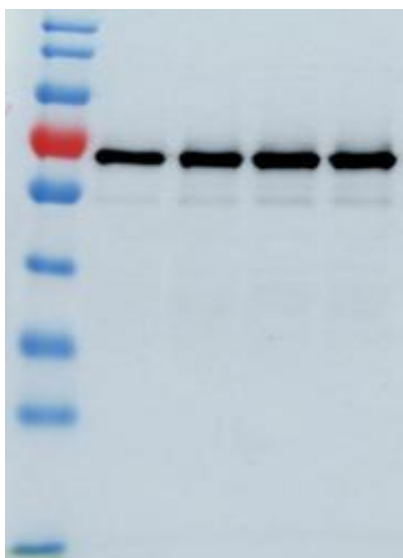

Figure 5D:  
IP; HA Ab

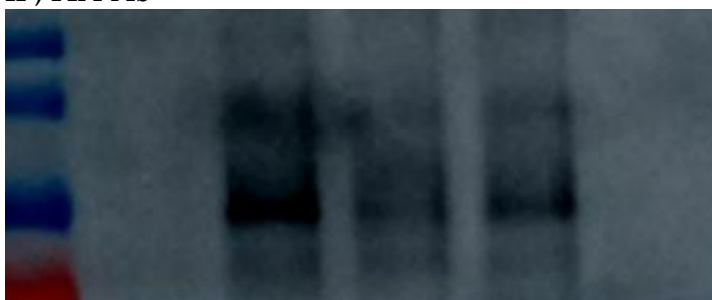

Direct WB; Flag Ab

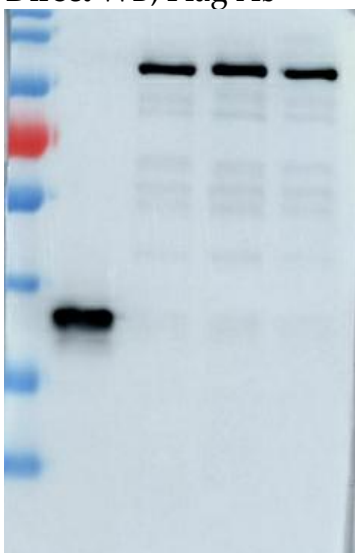

Direct WB; HA Ab

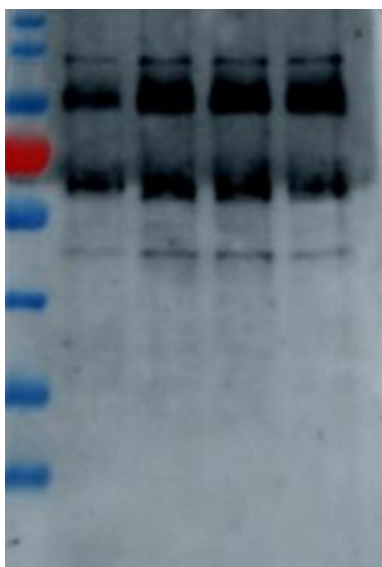

Supplement: s1 [file s1]
